# Supplementary material for: Efficacy of pharmacotherapies for bulimia nervosa: a systematic review and meta-analysis
Source: PubMed Central journal article supplement (PMC10693702; doi:10.1186/s40360-023-00713-7), 2023-12-02
Supplement: 40360_2023_713_MOESM1_ESM.pdf [file 40360_2023_713_MOESM1_ESM.pdf]

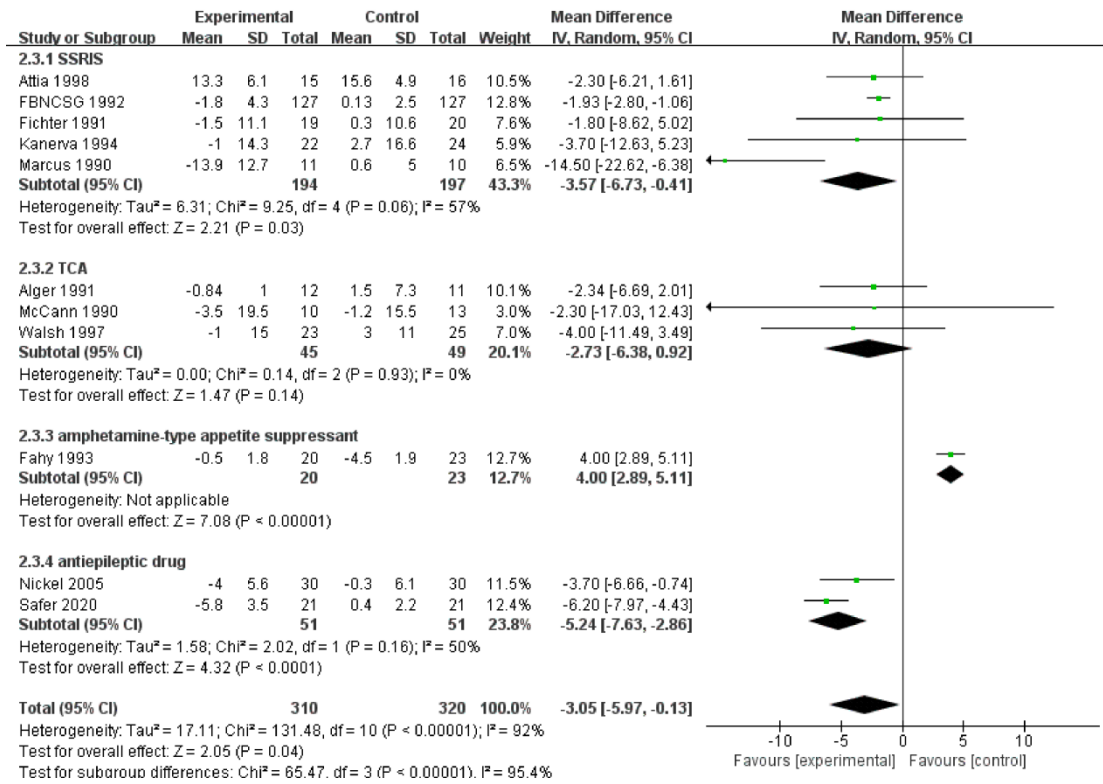

Supplementary Fig. S1 Forest plot of weight change.

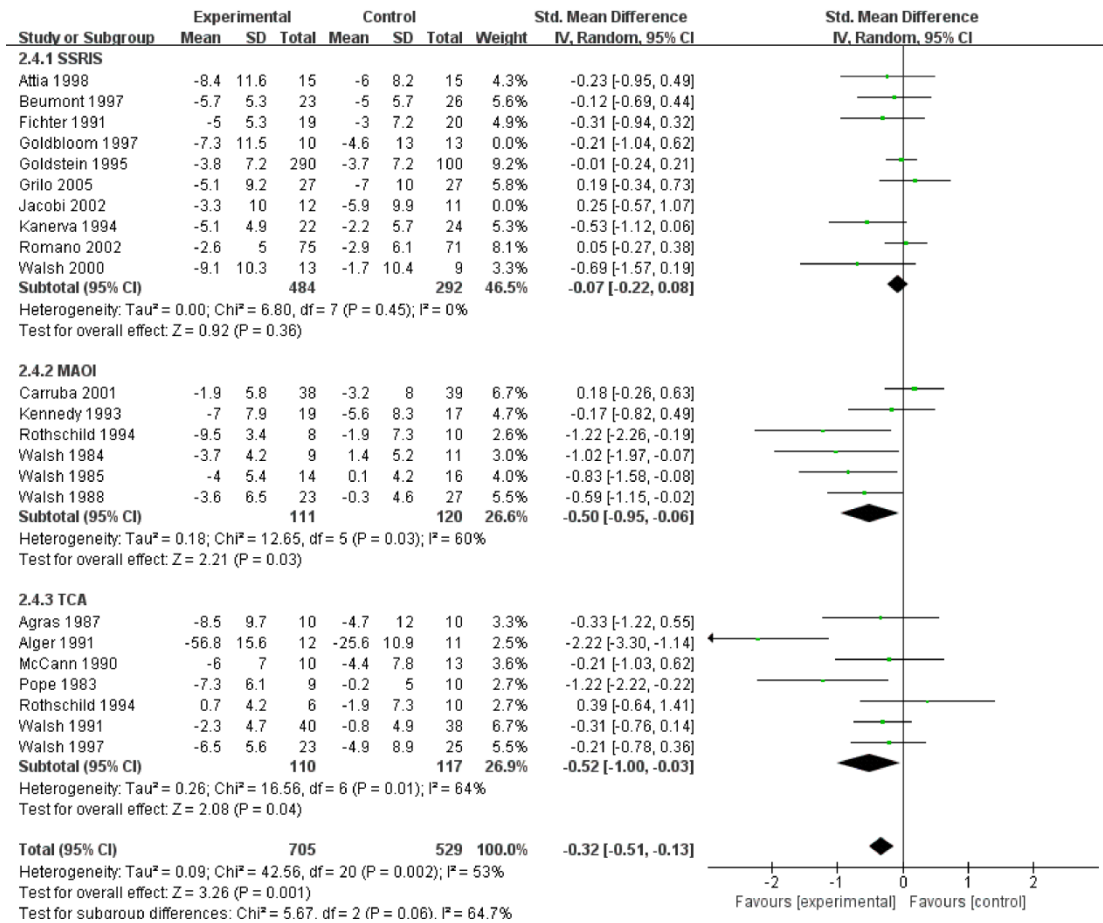

Supplementary Fig. S2 Forest plot of depression scores.

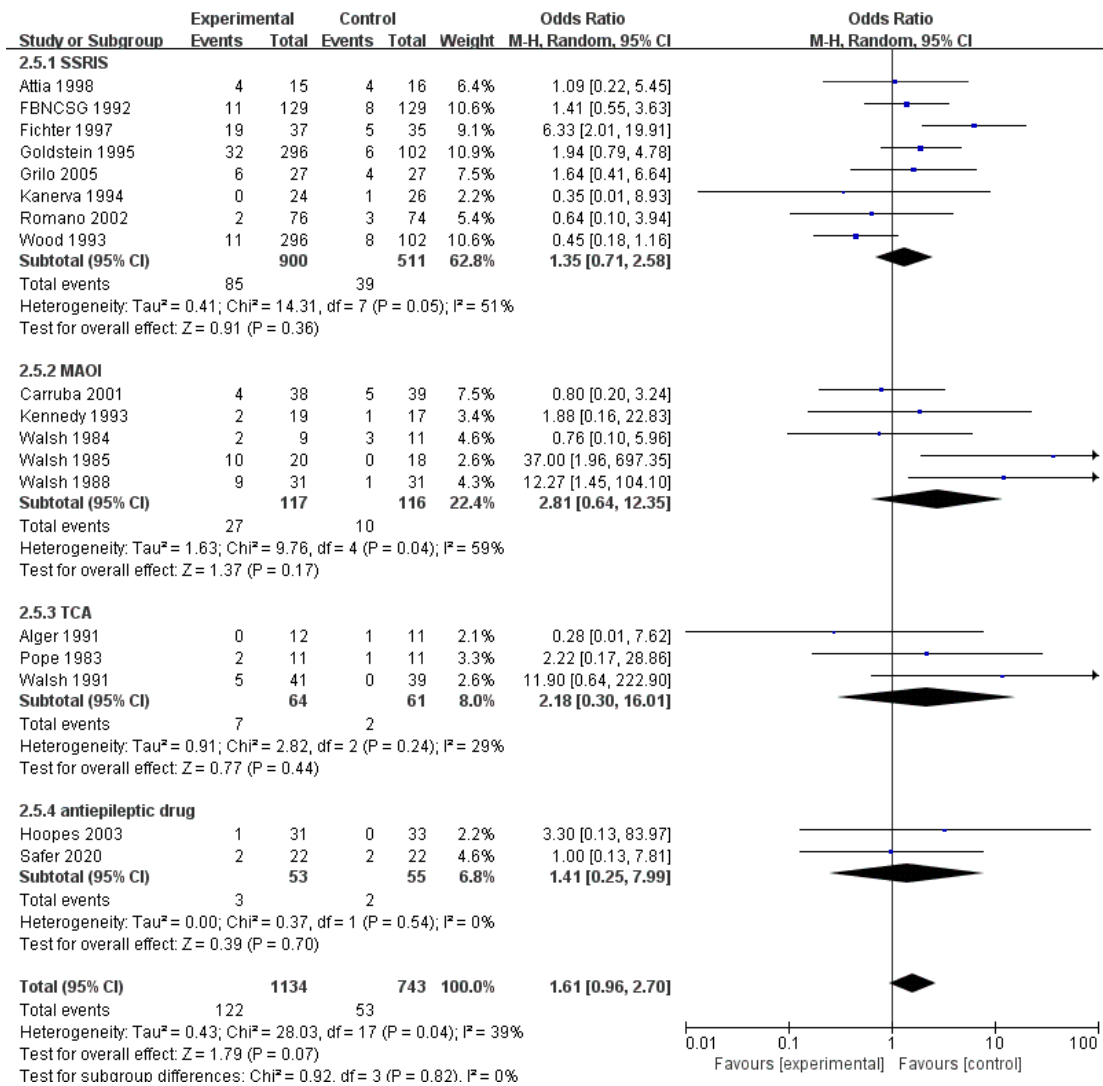

Supplementary Fig. S3 Forest plot of dropouts due to adverse events.

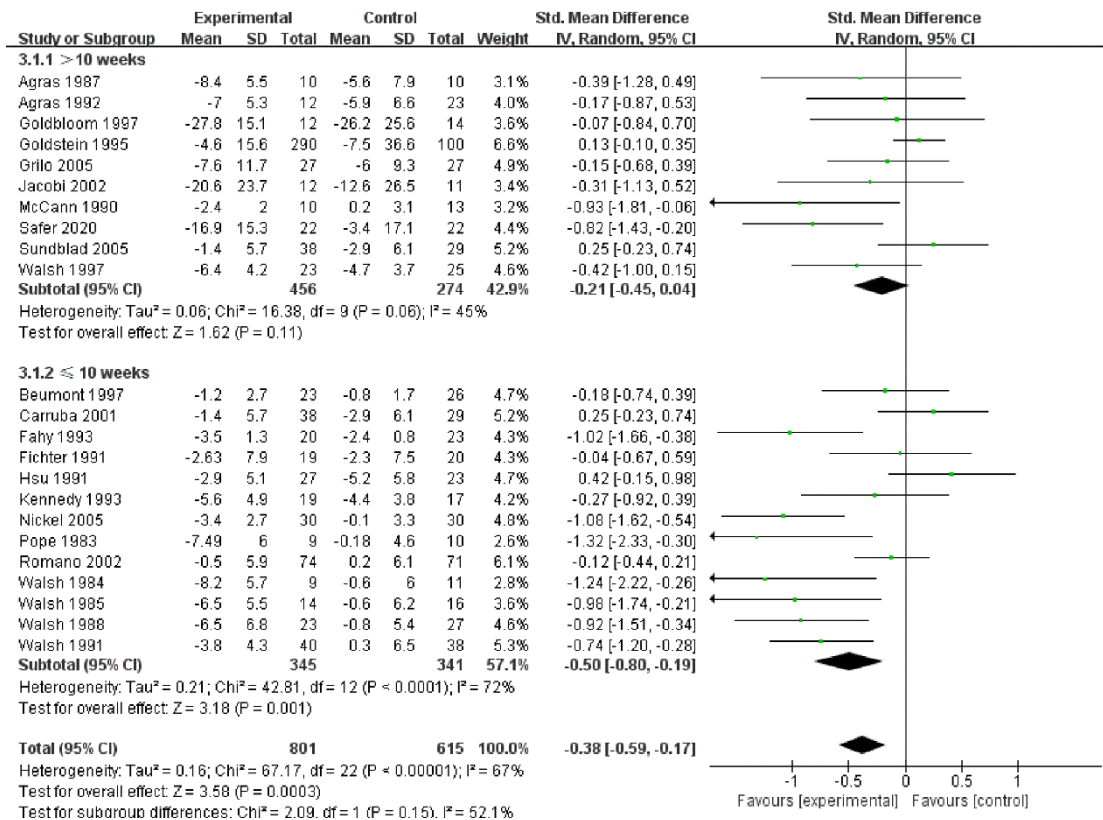

**Supplementary Fig. S4** Forest plot of binge-eating episodes (10 weeks as the boundary).

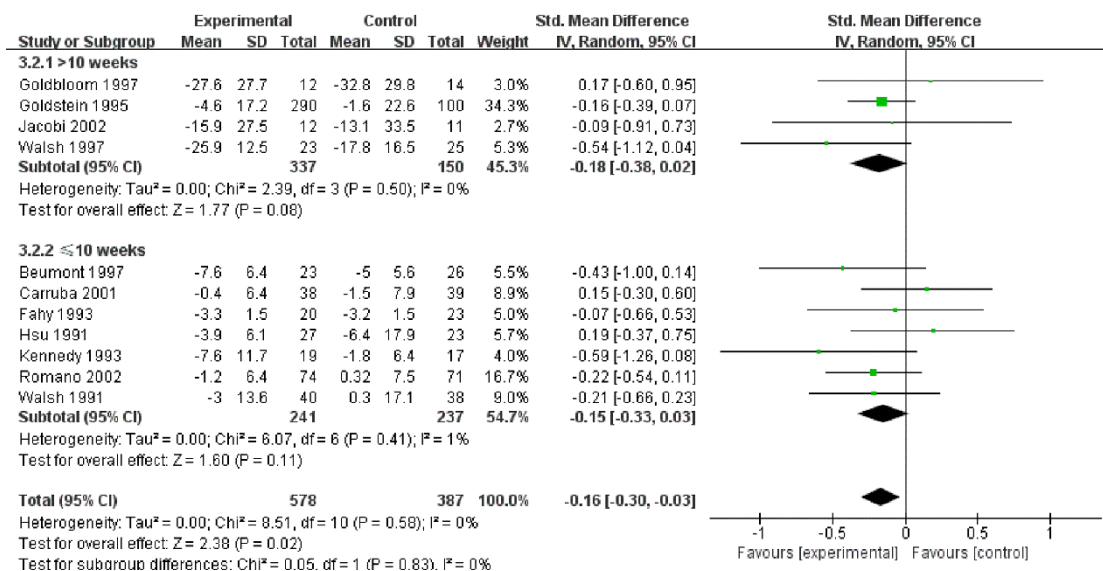

**Supplementary Fig. S5** Forest plot of vomiting episodes (10 weeks as the boundary).
